# Supplementary material
Source: PubMed Central journal article supplement (PMC3264743)
Supplement: NIHMS344475-supplement-1_si_001.pdf [file NIHMS344475-supplement-1_si_001.pdf]

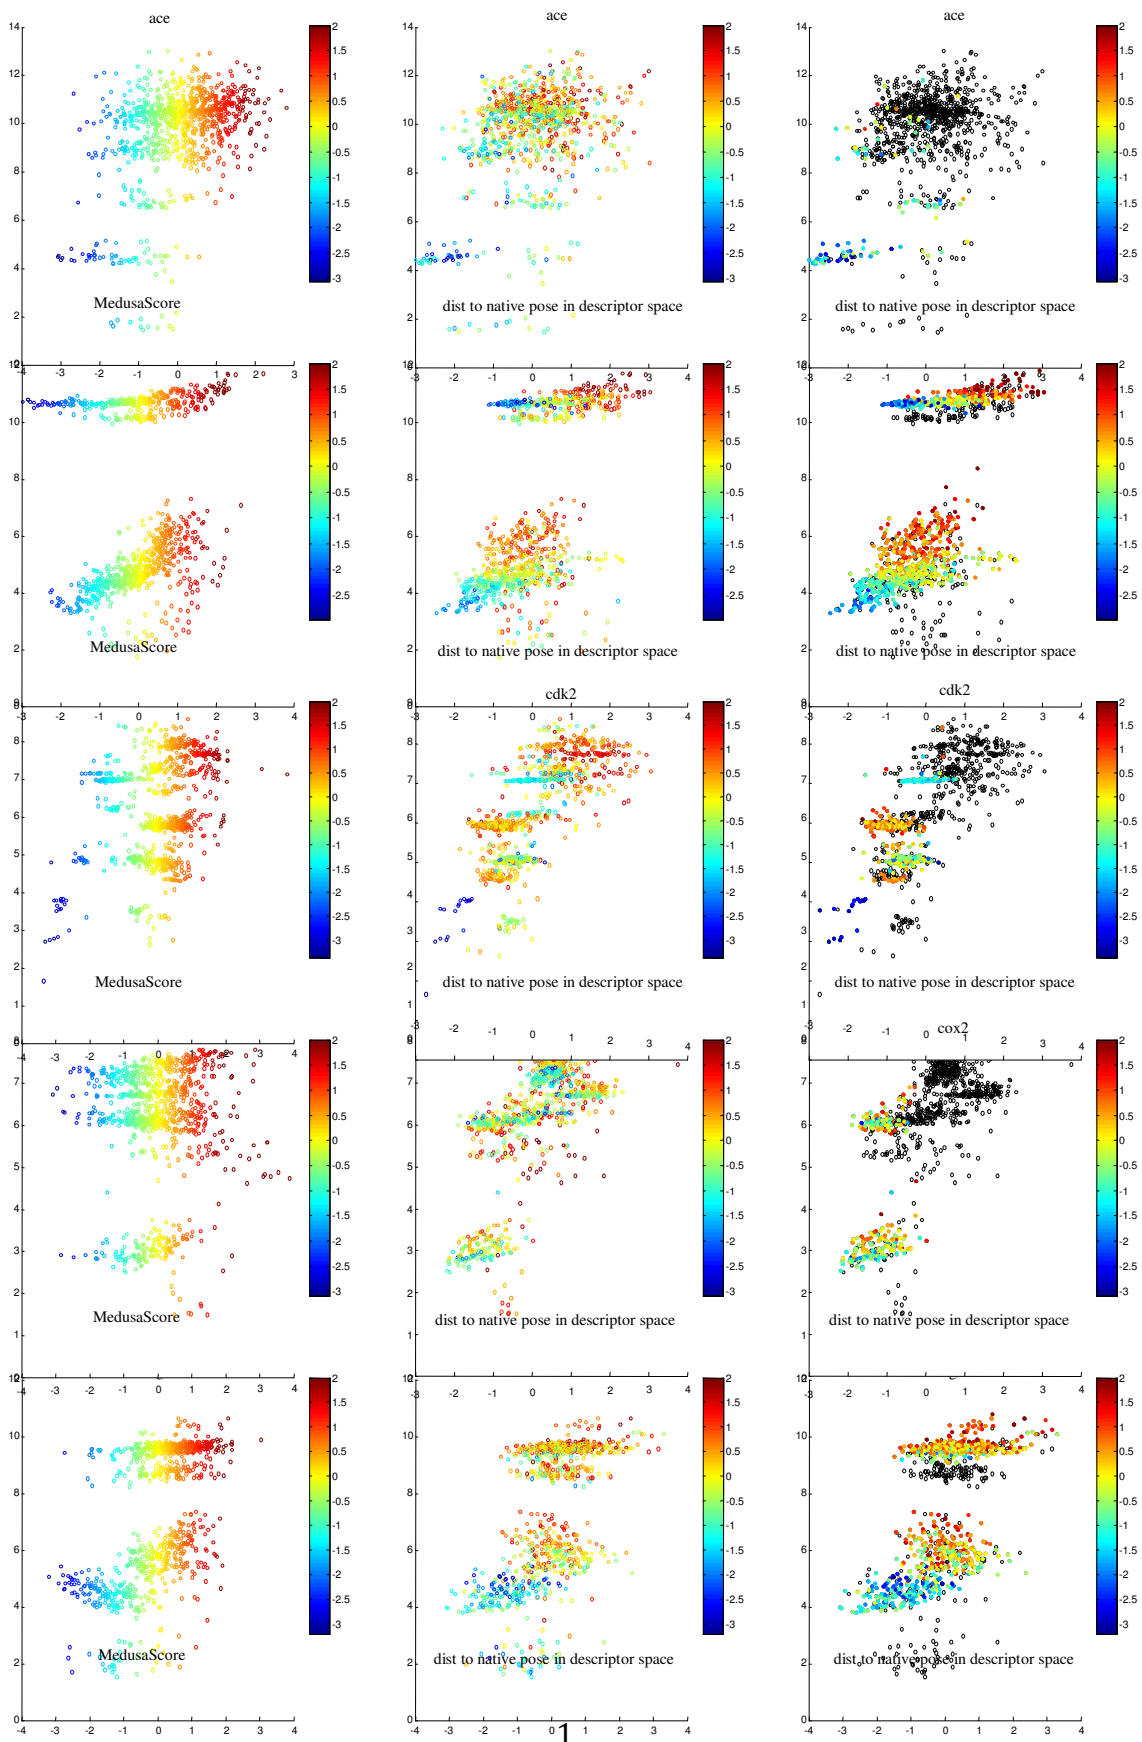

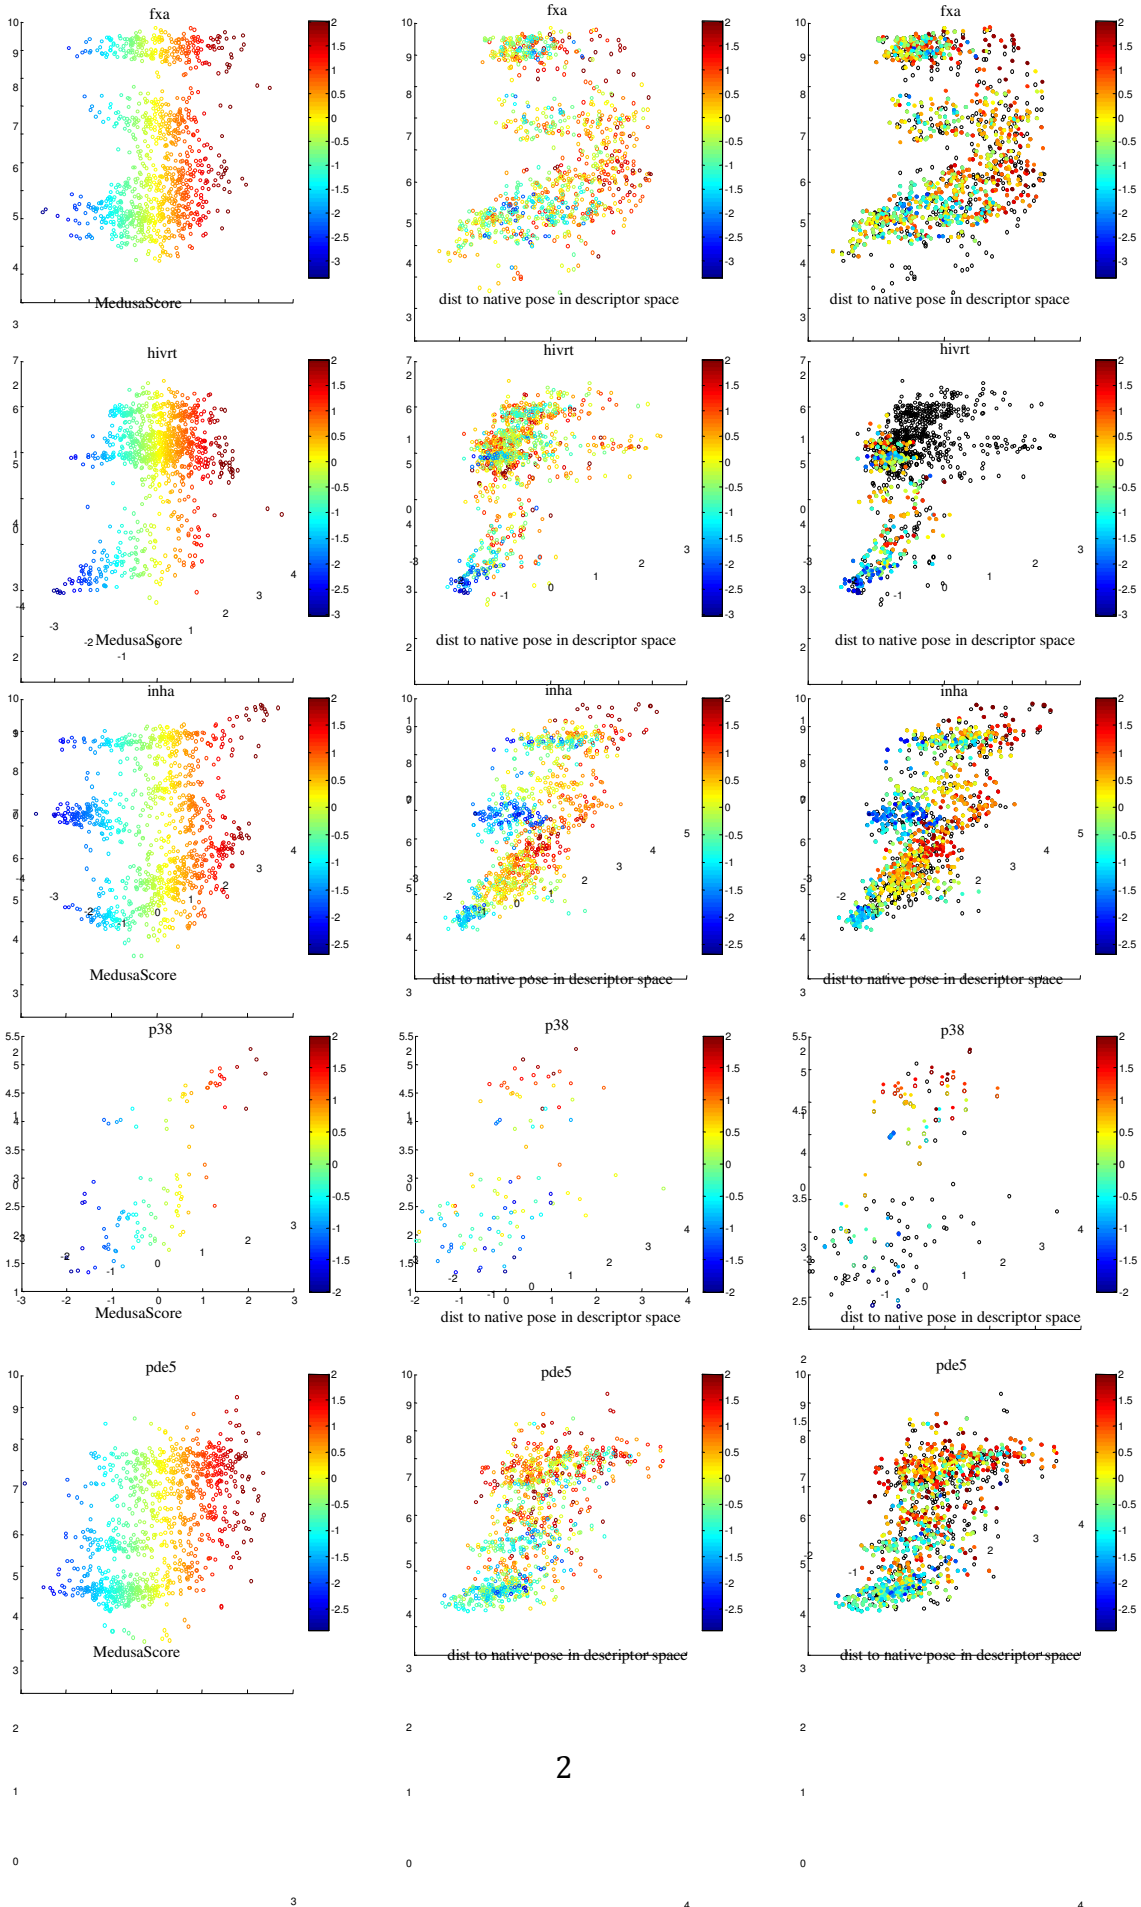

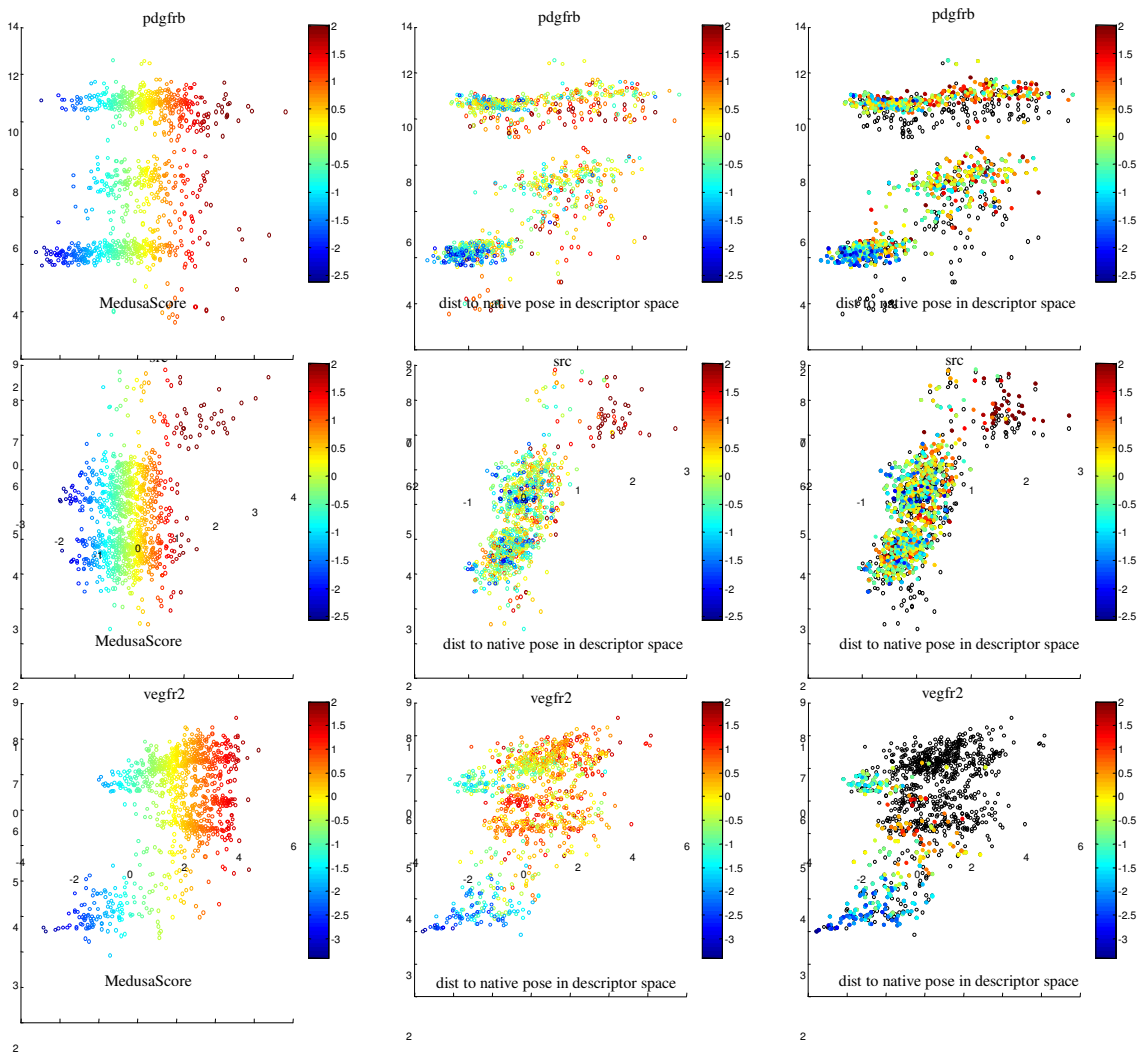

**Figure S1.** The distribution of poses generated from re-docking cognate ligand against its respective target. The left plot shows the pose distribution based on z-score values of MedusaScore (x-axis) vs. RMSD values (y-axis). The middle plot shows the pose distribution based on the distance to the native pose (x-axis) vs. RMSD (y-axis). The right plot highlights the poses used for constructing filter. The data points are colored corresponding to their z-score values of MedusaScore (the smaller z-score values, the better the MedusaScore)

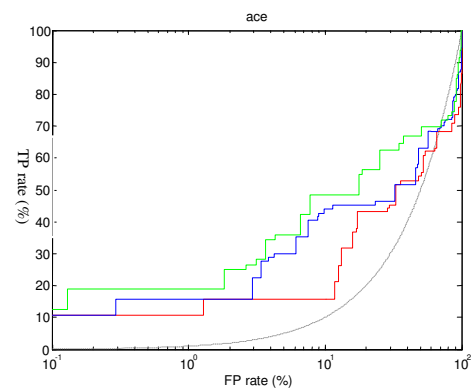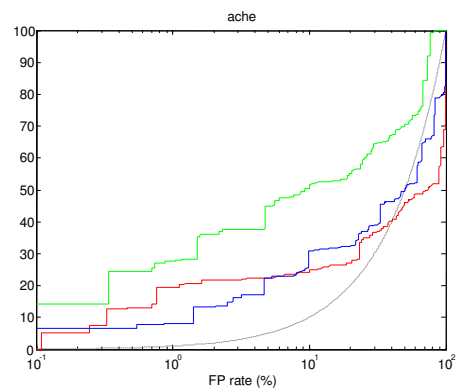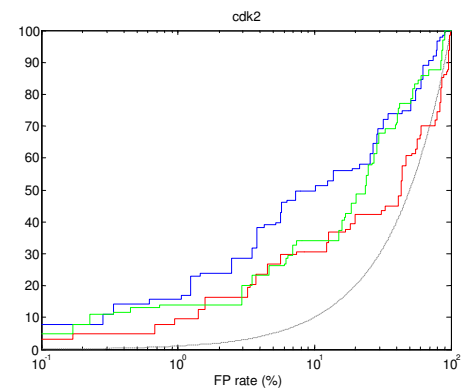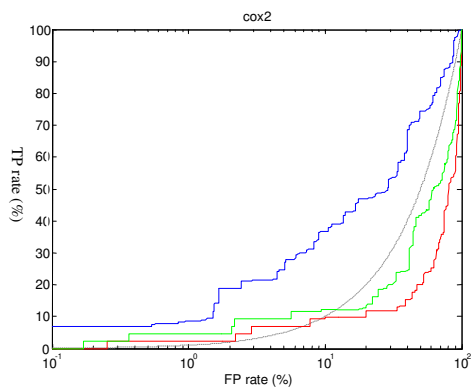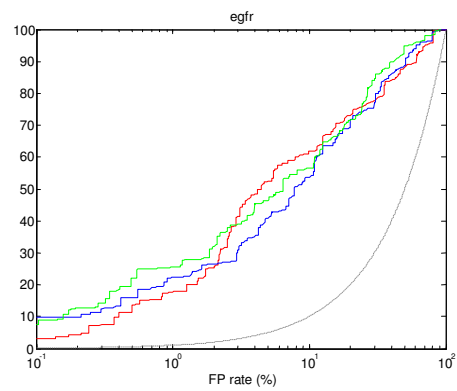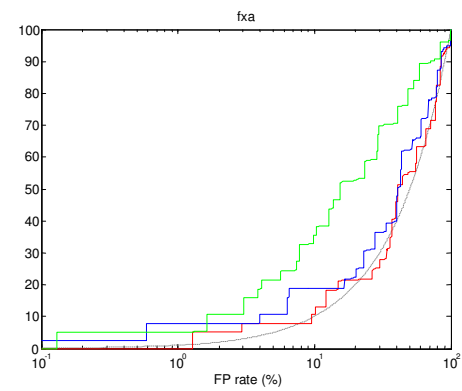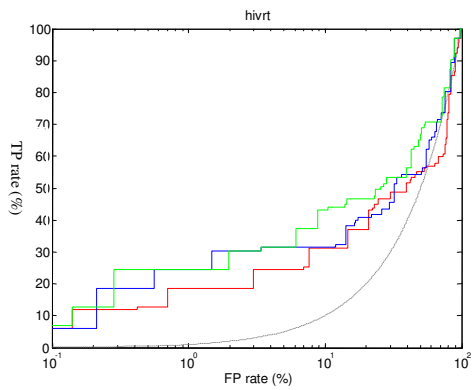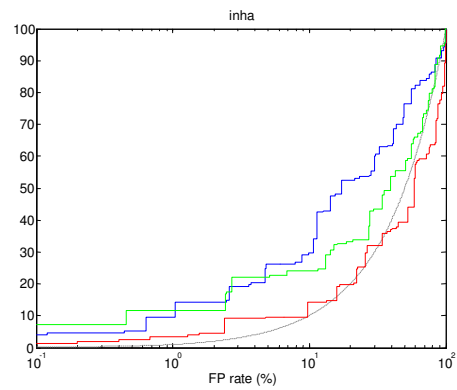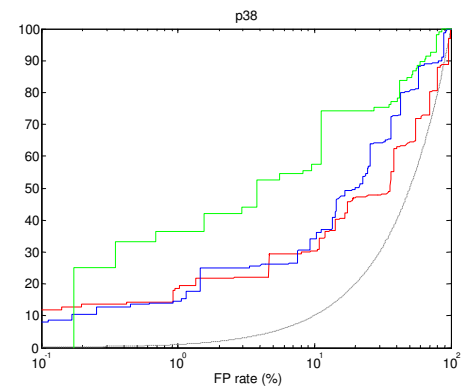

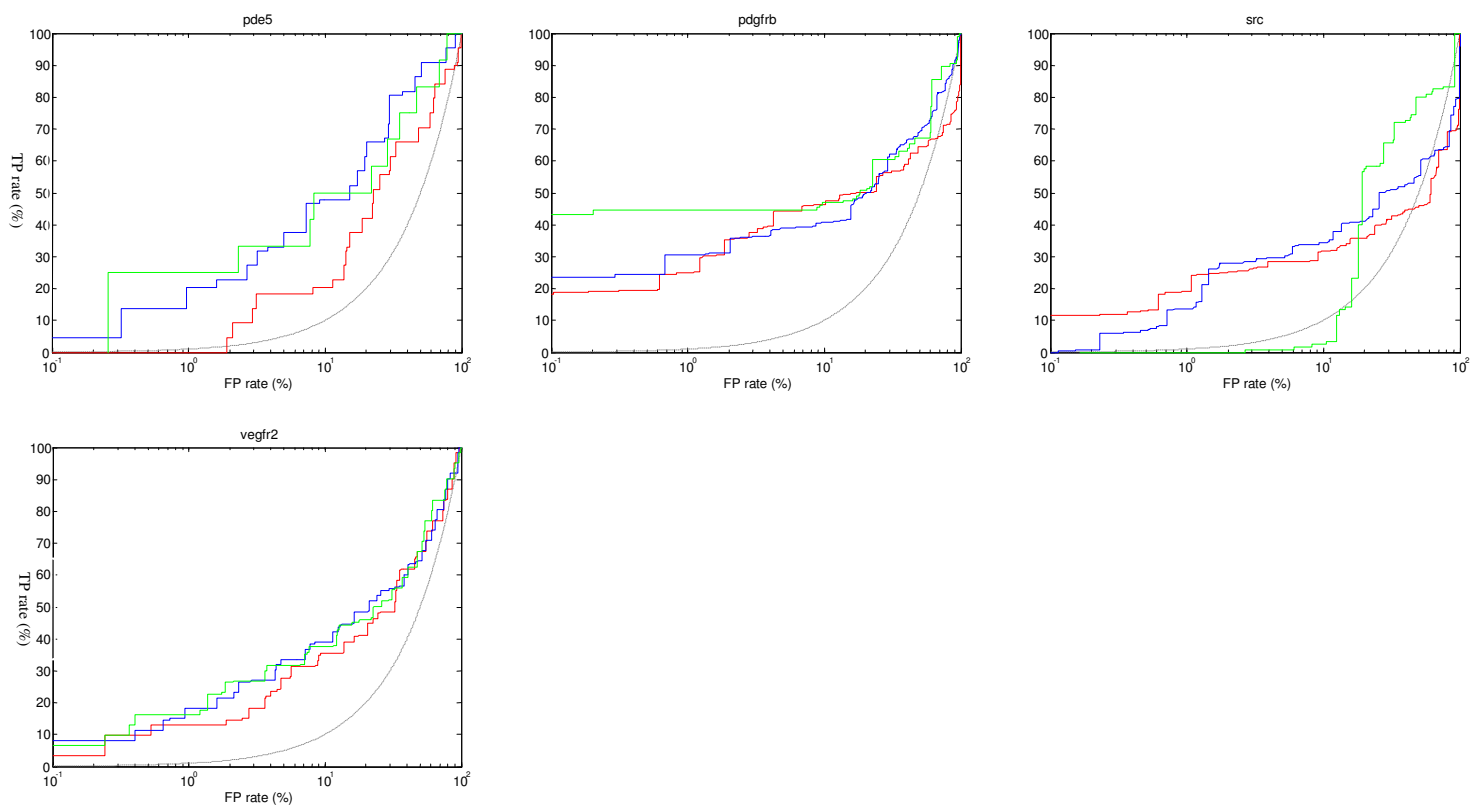

**Figure S2.** The awROC curves of VS experiments for the 13 DUD data sets. For each target, the true positive (FP) rate is plotted against the logarithmic false positive (FP) rate. Gray dot dash lines correspond to the random VS performance, red lines are from MedusaScore, blue lines are from the MedusaScore +DistScore approach, and green lines are from the MedusaScore + pose filter approach

**Table S1.** awROCE enrichment at 0.5% of structure-based scoring functions and the combined scoring approach

| target | XSCORE::HMSCORE | Fred::ChemScore     | Fred::PLP           | Fred::Chemgauss3    | MedusaScore  | MedusaScore + filter |
|--------|-----------------|---------------------|---------------------|---------------------|--------------|----------------------|
| ace    | 32.78 ± 8.06    | 25.45 ± 7.70        | <b>43.00 ± 9.06</b> | 28.11 ± 9.13        | 21.65 ± 5.53 | 36.95 ± 8.26         |
| ache   | 28.48 ± 6.55    | 0.00 ± 0.00         | 0.00 ± 0.00         | 1.12 ± 0.48         | 24.38 ± 6.74 | <b>44.97 ± 10.16</b> |
| cdk2   | 8.51 ± 4.13     | 27.71 ± 7.42        | <b>42.88 ± 6.83</b> | 27.90 ± 9.02        | 11.04 ± 3.19 | 26.73 ± 4.85         |
| cox2   | 5.89 ± 1.19     | 0.00 ± 0.00         | 4.45 ± 2.10         | <b>12.07 ± 2.49</b> | 4.16 ± 2.07  | 8.29 ± 2.87          |
| egfr   | 8.21 ± 1.98     | 18.38 ± 3.19        | 5.63 ± 1.70         | 12.80 ± 2.91        | 23.59 ± 4.27 | <b>41.61 ± 4.49</b>  |
| fxa    | 8.18 ± 5.71     | <b>14.52 ± 4.79</b> | 6.70 ± 4.99         | 4.86 ± 4.04         | 0.00 ± 0.00  | 9.69 ± 4.87          |
| hivrt  | 23.77 ± 7.62    | 11.33 ± 5.73        | 0.01 ± 0.39         | 15.66 ± 5.91        | 23.92 ± 8.00 | <b>46.03 ± 9.60</b>  |
| inha   | 8.79 ± 1.29     | 17.79 ± 5.89        | 15.70 ± 4.28        | 17.23 ± 4.25        | 5.92 ± 1.35  | <b>21.66 ± 6.24</b>  |
| p38    | 0.00 ± 0.15     | 12.75 ± 6.45        | 13.03 ± 6.46        | 13.12 ± 6.39        | 28.69 ± 7.32 | <b>66.95 ± 17.33</b> |
| pde5   | 0.00 ± 0.00     | 1.11 ± 3.36         | 0.06 ± 0.84         | 9.59 ± 5.05         | 0.00 ± 0.00  | <b>59.08 ± 13.50</b> |
| pdgfrb | 29.65 ± 5.32    | 15.16 ± 4.12        | 16.58 ± 4.07        | 16.26 ± 6.02        | 37.18 ± 6.51 | <b>86.46 ± 11.56</b> |
| src    | 0.50 ± 0.42     | <b>25.97 ± 7.23</b> | 0.00 ± 0.00         | 5.62 ± 1.26         | 24.77 ± 6.29 | 0.00 ± 0.00          |
| vegfr2 | 7.85 ± 4.38     | <b>34.53 ± 6.75</b> | 6.18 ± 3.11         | 14.18 ± 5.57        | 19.97 ± 5.94 | 30.00 ± 6.66         |

**Table S2.** awROCE enrichment at 1% of structure-based scoring functions and the combined scoring approach

| target | XSCORE::HMSCORE    | Fred::ChemScore     | Fred::PLP           | Fred::Chemgauss3 | MedusaScore  | MedusaScore + filter |
|--------|--------------------|---------------------|---------------------|------------------|--------------|----------------------|
| ace    | 23.71 ± 4.24       | 15.47 ± 4.77        | <b>24.56 ± 4.15</b> | 21.33 ± 4.50     | 10.91 ± 2.86 | 18.44 ± 4.13         |
| ache   | 14.64 ± 3.31       | 0.00 ± 0.00         | 0.02 ± 0.08         | 1.37 ± 0.38      | 18.37 ± 3.91 | <b>26.22 ± 4.95</b>  |
| cdk2   | 8.99 ± 2.42        | 20.90 ± 4.84        | <b>26.56 ± 4.03</b> | 20.13 ± 4.57     | 9.47 ± 2.06  | 14.36 ± 2.33         |
| cox2   | <b>9.67 ± 1.85</b> | 0.83 ± 0.51         | 2.79 ± 1.07         | 8.79 ± 1.64      | 2.08 ± 1.03  | 4.14 ± 1.44          |
| egfr   | 6.46 ± 1.34        | 19.48 ± 2.33        | 4.75 ± 1.34         | 10.37 ± 1.78     | 17.22 ± 1.99 | <b>25.69 ± 2.13</b>  |
| fxa    | 4.86 ± 2.42        | 11.26 ± 2.73        | 15.20 ± 3.76        | 13.82 ± 4.35     | 0.15 ± 0.95  | 4.85 ± 2.44          |
| hivrt  | 11.94 ± 3.90       | 9.12 ± 3.49         | 4.13 ± 3.35         | 18.13 ± 5.15     | 17.39 ± 4.45 | <b>22.88 ± 4.77</b>  |
| inha   | 9.28 ± 2.15        | <b>16.46 ± 3.17</b> | 7.96 ± 2.15         | 10.33 ± 2.39     | 3.73 ± 0.63  | 11.26 ± 2.91         |
| p38    | 6.28 ± 3.31        | 6.52 ± 3.22         | 6.51 ± 3.23         | 6.56 ± 3.19      | 18.46 ± 4.71 | <b>35.65 ± 8.41</b>  |
| pde5   | 0.00 ± 0.00        | 4.80 ± 2.39         | 4.23 ± 2.43         | 7.24 ± 2.86      | 0.00 ± 0.00  | <b>26.49 ± 6.07</b>  |
| pdgfrb | 14.82 ± 2.66       | 16.93 ± 3.20        | 12.28 ± 2.73        | 11.59 ± 2.74     | 23.49 ± 3.46 | <b>43.18 ± 5.77</b>  |
| src    | 0.53 ± 0.21        | <b>21.37 ± 4.10</b> | 0.52 ± 0.31         | 7.27 ± 1.98      | 18.46 ± 3.93 | 0.00 ± 0.00          |
| vegfr2 | 6.47 ± 2.38        | <b>17.25 ± 3.37</b> | 3.09 ± 1.55         | 13.22 ± 3.34     | 12.30 ± 2.89 | 15.39 ± 3.23         |

**Table S3.** awROCE enrichment at 2% of structure-based scoring functions and the combined scoring approach

| target | XSCORE::HMSCORE | Fred::ChemScore     | Fred::PLP           | Fred::Chemgauss3   | MedusaScore  | MedusaScore + filter |
|--------|-----------------|---------------------|---------------------|--------------------|--------------|----------------------|
| ace    | 15.47 ± 3.01    | 12.00 ± 2.54        | <b>12.72 ± 2.05</b> | 14.39 ± 2.60       | 7.84 ± 1.78  | 11.53 ± 2.56         |
| ache   | 7.72 ± 1.60     | 0.77 ± 0.38         | 0.82 ± 0.60         | 0.94 ± 0.23        | 10.47 ± 1.89 | <b>17.16 ± 2.60</b>  |
| cdk2   | 7.71 ± 1.57     | <b>15.60 ± 1.91</b> | 14.42 ± 1.88        | 14.97 ± 1.76       | 8.30 ± 1.33  | 7.18 ± 1.16          |
| cox2   | 7.34 ± 1.21     | 2.07 ± 0.59         | 3.10 ± 0.79         | <b>8.23 ± 1.10</b> | 1.04 ± 0.52  | 2.07 ± 0.72          |
| egfr   | 4.92 ± 0.79     | 13.08 ± 1.39        | 4.63 ± 0.78         | 8.18 ± 0.98        | 12.46 ± 1.22 | <b>15.78 ± 1.25</b>  |
| fxa    | 2.45 ± 1.22     | <b>10.63 ± 1.99</b> | 10.46 ± 1.99        | 7.72 ± 1.73        | 2.40 ± 1.23  | 4.91 ± 1.66          |
| hivrt  | 8.59 ± 2.20     | 6.53 ± 2.17         | 5.59 ± 2.30         | 10.76 ± 2.24       | 8.68 ± 2.22  | <b>12.76 ± 2.81</b>  |
| inha   | 4.68 ± 1.05     | <b>8.75 ± 1.59</b>  | 5.43 ± 1.24         | 5.47 ± 1.20        | 2.63 ± 0.31  | 5.65 ± 1.48          |
| p38    | 3.25 ± 1.62     | 3.27 ± 1.61         | 3.26 ± 1.61         | 3.28 ± 1.59        | 11.34 ± 2.21 | <b>20.63 ± 4.47</b>  |
| pde5   | 0.00 ± 0.00     | 4.90 ± 1.72         | 2.58 ± 1.49         | 4.53 ± 1.57        | 1.91 ± 2.01  | <b>14.27 ± 3.61</b>  |
| pdgfrb | 7.56 ± 1.33     | 11.29 ± 1.98        | 6.30 ± 1.36         | 6.16 ± 1.36        | 16.32 ± 1.92 | <b>21.58 ± 2.89</b>  |
| src    | 0.40 ± 0.23     | 18.72 ± 2.11        | 0.74 ± 0.21         | 5.30 ± 0.68        | 11.84 ± 1.93 | 0.00 ± 0.04          |
| vegfr2 | 4.96 ± 1.29     | 12.06 ± 2.06        | 2.49 ± 0.96         | 7.07 ± 1.55        | 6.85 ± 1.57  | <b>12.70 ± 1.90</b>  |

**Table S4.** awROCE enrichment at 5% of structure-based scoring functions and the combined scoring approach

| target | XSCORE::HMSCORE    | Fred::ChemScore    | Fred::PLP          | Fred::Chemgauss3   | MedusaScore         | MedusaScore + filter |
|--------|--------------------|--------------------|--------------------|--------------------|---------------------|----------------------|
| ace    | 8.48 ± 1.00        | 5.84 ± 0.89        | 5.44 ± 0.96        | <b>9.18 ± 1.12</b> | 3.13 ± 0.71         | 7.04 ± 1.00          |
| ache   | 3.09 ± 0.64        | 0.64 ± 0.28        | 4.08 ± 0.72        | 1.94 ± 0.32        | 4.35 ± 0.75         | <b>8.39 ± 1.12</b>   |
| cdk2   | 3.64 ± 0.62        | 6.92 ± 0.70        | <b>7.74 ± 0.82</b> | 7.40 ± 0.77        | 5.30 ± 0.69         | 5.14 ± 0.69          |
| cox2   | <b>4.94 ± 0.56</b> | 1.61 ± 0.32        | 2.40 ± 0.40        | 5.38 ± 0.56        | 1.24 ± 0.35         | 1.66 ± 0.39          |
| egfr   | 3.60 ± 0.37        | 9.56 ± 0.50        | 3.62 ± 0.40        | 4.36 ± 0.43        | <b>10.41 ± 0.49</b> | 9.25 ± 0.57          |
| fxa    | 1.97 ± 0.72        | 5.79 ± 0.93        | <b>6.13 ± 0.91</b> | 3.16 ± 0.69        | 1.54 ± 0.60         | 4.18 ± 0.91          |
| hivrt  | 4.32 ± 1.08        | 5.14 ± 1.03        | 3.07 ± 0.80        | 7.21 ± 1.05        | 4.56 ± 0.97         | <b>5.88 ± 1.01</b>   |
| inha   | 2.69 ± 0.57        | <b>5.54 ± 0.76</b> | 3.10 ± 0.46        | 3.99 ± 0.69        | 1.97 ± 0.43         | 4.18 ± 0.75          |
| p38    | 1.30 ± 0.65        | 1.84 ± 0.65        | 2.64 ± 0.74        | 1.35 ± 0.64        | 5.85 ± 1.04         | <b>10.49 ± 1.49</b>  |
| pde5   | 0.00 ± 0.00        | 2.95 ± 0.76        | 2.00 ± 0.77        | 3.15 ± 0.69        | 3.57 ± 0.84         | <b>6.90 ± 1.36</b>   |
| pdgfrb | 3.97 ± 0.62        | 6.68 ± 0.72        | 4.27 ± 0.75        | 4.57 ± 0.64        | 8.33 ± 0.77         | <b>8.63 ± 1.15</b>   |
| src    | 0.72 ± 0.10        | <b>9.67 ± 0.77</b> | 0.49 ± 0.12        | 3.28 ± 0.76        | 5.49 ± 0.78         | 0.19 ± 0.11          |

|        |             |                    |             |             |             |             |
|--------|-------------|--------------------|-------------|-------------|-------------|-------------|
| vegfr2 | 1.98 ± 0.52 | <b>6.65 ± 0.80</b> | 2.24 ± 0.58 | 2.92 ± 0.62 | 5.44 ± 0.75 | 6.27 ± 0.79 |
|--------|-------------|--------------------|-------------|-------------|-------------|-------------|

---

**Table S5.** awAUC of structure-based scoring functions and the combined scoring approach

| target | XSCORE::HMSCORE    | Fred::ChemScore    | Fred::PLP          | Fred::Chemgauss3   | MedusaScore | MedusaScore + filter |
|--------|--------------------|--------------------|--------------------|--------------------|-------------|----------------------|
| ace    | <b>0.69 ± 0.04</b> | 0.68 ± 0.03        | 0.64 ± 0.03        | 0.66 ± 0.04        | 0.52 ± 0.04 | 0.63 ± 0.04          |
| ache   | 0.42 ± 0.03        | 0.47 ± 0.03        | 0.51 ± 0.03        | 0.47 ± 0.03        | 0.43 ± 0.04 | <b>0.73 ± 0.03</b>   |
| cdk2   | 0.60 ± 0.03        | <b>0.78 ± 0.02</b> | 0.61 ± 0.03        | <b>0.78 ± 0.02</b> | 0.57 ± 0.03 | 0.71 ± 0.02          |
| cox2   | 0.68 ± 0.02        | 0.64 ± 0.01        | 0.61 ± 0.02        | <b>0.73 ± 0.02</b> | 0.27 ± 0.02 | 0.39 ± 0.02          |
| egfr   | 0.57 ± 0.01        | 0.92 ± 0.00        | 0.67 ± 0.02        | 0.66 ± 0.01        | 0.83 ± 0.01 | <b>0.85 ± 0.01</b>   |
| fxa    | 0.57 ± 0.03        | 0.75 ± 0.02        | <b>0.76 ± 0.02</b> | 0.73 ± 0.02        | 0.52 ± 0.03 | 0.72 ± 0.02          |
| hivrt  | 0.53 ± 0.04        | 0.68 ± 0.04        | 0.54 ± 0.04        | <b>0.75 ± 0.03</b> | 0.55 ± 0.04 | 0.64 ± 0.04          |
| inha   | 0.29 ± 0.03        | 0.55 ± 0.03        | 0.45 ± 0.03        | 0.51 ± 0.03        | 0.44 ± 0.03 | <b>0.57 ± 0.03</b>   |
| p38    | 0.39 ± 0.03        | 0.42 ± 0.03        | 0.40 ± 0.03        | 0.35 ± 0.03        | 0.64 ± 0.03 | <b>0.81 ± 0.03</b>   |
| pde5   | 0.40 ± 0.03        | 0.70 ± 0.03        | 0.60 ± 0.03        | 0.61 ± 0.03        | 0.65 ± 0.03 | <b>0.75 ± 0.04</b>   |
| pdgfrb | 0.44 ± 0.03        | <b>0.74 ± 0.01</b> | 0.64 ± 0.02        | 0.63 ± 0.02        | 0.60 ± 0.03 | 0.69 ± 0.03          |
| src    | 0.44 ± 0.02        | <b>0.83 ± 0.01</b> | 0.45 ± 0.02        | 0.67 ± 0.02        | 0.50 ± 0.03 | 0.66 ± 0.05          |
| vegfr2 | 0.43 ± 0.03        | <b>0.83 ± 0.01</b> | 0.58 ± 0.03        | 0.74 ± 0.02        | 0.65 ± 0.03 | 0.67 ± 0.03          |



**Table S6.** awROCE enrichment at 0.5% of FieldScreen, FLAP (LBX), FLAP(RBLB), MedusaScore + filter

| target | FieldScreen         | FLAP (LBX)          | FLAP (RBLB)          | MedusaScore + filter |
|--------|---------------------|---------------------|----------------------|----------------------|
| ace    | 13.76 ± 7.42        | 28.56 ± 8.92        | 6.53 ± 1.96          | <b>36.95 ± 8.26</b>  |
| ache   | 15.88 ± 5.11        | <b>63.00 ± 8.16</b> | 48.39 ± 8.07         | 44.97 ± 10.16        |
| cdk2   | 8.56 ± 3.29         | 27.66 ± 6.17        | <b>41.61 ± 7.53</b>  | 26.73 ± 4.85         |
| cox2   | 50.93 ± 4.67        | <b>57.33 ± 6.00</b> | 16.74 ± 5.59         | 8.29 ± 2.87          |
| egfr   | <b>48.57 ± 5.22</b> | 47.96 ± 5.40        | 19.80 ± 2.89         | 41.61 ± 4.49         |
| fxa    | 0.90 ± 2.54         | 9.57 ± 4.97         | 8.68 ± 1.81          | <b>9.69 ± 4.87</b>   |
| hivrt  | 39.99 ± 8.18        | 33.47 ± 7.44        | 27.59 ± 4.46         | <b>46.03 ± 9.60</b>  |
| inha   | 59.47 ± 7.05        | 70.23 ± 8.70        | <b>79.98 ± 8.20</b>  | 21.66 ± 6.24         |
| p38    | 3.99 ± 0.74         | 0.00 ± 0.00         | 5.56 ± 2.00          | <b>66.95 ± 17.33</b> |
| pde5   | 8.19 ± 3.90         | 28.35 ± 5.61        | <b>73.64 ± 10.84</b> | 59.08 ± 13.50        |
| pdgfrb | 25.91 ± 5.38        | 1.61 ± 0.96         | 2.36 ± 0.57          | <b>86.46 ± 11.56</b> |
| src    | 13.09 ± 4.78        | 0.00 ± 0.04         | <b>63.41 ± 8.08</b>  | 0.00 ± 0.00          |
| vegfr2 | 13.58 ± 4.51        | 6.34 ± 3.32         | <b>48.22 ± 6.28</b>  | 30.00 ± 6.66         |

**Table S7.** awROCE enrichment at 1% of FieldScreen, FLAP (LBX), FLAP(RBLB), MedusaScore + filter

| target | FieldScreen         | FLAP (LBX)          | FLAP (RBLB)         | MedusaScore + filter |
|--------|---------------------|---------------------|---------------------|----------------------|
| ace    | 12.23 ± 3.51        | <b>21.84 ± 5.58</b> | 11.15 ± 3.79        | 18.44 ± 4.13         |
| ache   | 19.69 ± 5.55        | <b>34.58 ± 3.99</b> | 28.66 ± 4.07        | 26.22 ± 4.95         |
| cdk2   | 4.27 ± 1.64         | 18.41 ± 3.28        | <b>22.11 ± 3.18</b> | 14.36 ± 2.33         |
| cox2   | 30.33 ± 2.54        | <b>30.70 ± 2.77</b> | 14.98 ± 2.00        | 4.14 ± 1.44          |
| egfr   | <b>28.04 ± 2.55</b> | 27.45 ± 2.75        | 14.66 ± 1.52        | 25.69 ± 2.13         |
| fxa    | 3.36 ± 2.32         | 8.27 ± 3.81         | <b>9.67 ± 2.48</b>  | 4.85 ± 2.44          |
| hivrt  | 19.89 ± 4.07        | 16.64 ± 3.70        | 18.76 ± 3.59        | <b>22.88 ± 4.77</b>  |
| inha   | 11.77 ± 2.31        | 36.51 ± 3.98        | <b>44.46 ± 4.25</b> | 11.26 ± 2.91         |
| p38    | 32.58 ± 3.81        | 0.00 ± 0.00         | 2.82 ± 1.00         | <b>35.65 ± 8.41</b>  |
| pde5   | 2.04 ± 0.36         | 14.13 ± 2.79        | <b>36.76 ± 5.43</b> | 26.49 ± 6.07         |
| pdgfrb | 5.70 ± 2.82         | 2.19 ± 0.67         | 1.19 ± 0.29         | <b>43.18 ± 5.77</b>  |
| src    | 13.00 ± 2.66        | 0.33 ± 0.18         | <b>37.53 ± 4.42</b> | 0.00 ± 0.00          |
| vegfr2 | 6.77 ± 2.39         | 4.92 ± 1.96         | <b>24.12 ± 3.15</b> | 15.39 ± 3.23         |

**Table S8.** awROCE enrichment at 2% of FieldScreen, FLAP (LBX), FLAP(RBLB), MedusaScore + filter

| target | FieldScreen         | FLAB (LBX)          | FLAP (RBLB)         | MedusaScore + filter |
|--------|---------------------|---------------------|---------------------|----------------------|
| ace    | 8.08 ± 2.84         | <b>17.00 ± 2.70</b> | 7.52 ± 1.74         | 11.53 ± 2.56         |
| ache   | 14.14 ± 1.78        | <b>20.30 ± 2.01</b> | 16.68 ± 1.94        | 17.16 ± 2.60         |
| cdk2   | 2.13 ± 0.82         | 10.23 ± 1.62        | <b>11.94 ± 1.68</b> | 7.18 ± 1.16          |
| cox2   | <b>18.71 ± 1.62</b> | 16.28 ± 1.39        | 9.64 ± 1.07         | 2.07 ± 0.72          |
| egfr   | <b>17.75 ± 1.40</b> | 15.49 ± 1.27        | 8.93 ± 0.90         | 15.78 ± 1.25         |
| fxa    | <b>5.42 ± 1.35</b>  | 7.15 ± 2.29         | 5.14 ± 1.23         | 4.91 ± 1.66          |
| hivrt  | 11.77 ± 2.31        | 8.71 ± 2.14         | 9.57 ± 1.70         | <b>12.76 ± 2.81</b>  |
| inha   | 16.29 ± 1.91        | 18.26 ± 1.99        | <b>24.51 ± 2.15</b> | 5.65 ± 1.48          |
| p38    | 1.14 ± 0.20         | 0.00 ± 0.00         | 4.41 ± 1.18         | <b>20.63 ± 4.47</b>  |
| pde5   | 10.12 ± 2.07        | 7.05 ± 1.39         | <b>20.61 ± 2.76</b> | 14.27 ± 3.61         |
| pdgfrb | 8.51 ± 1.55         | 3.20 ± 1.04         | 0.93 ± 0.18         | <b>21.58 ± 2.89</b>  |
| src    | 3.55 ± 1.20         | 1.07 ± 0.64         | <b>19.91 ± 2.03</b> | 0.00 ± 0.04          |
| vegfr2 | 7.06 ± 1.56         | 3.38 ± 1.14         | <b>14.14 ± 1.69</b> | 12.70 ± 1.90         |

**Table S9.** awROCE enrichment at 5% of FieldScreen, FLAP (LBX), FLAP(RBLB), MedusaScore + filter

| target | FieldScreen         | FLAB (LBX)         | FLAP (RBLB)         | MedusaScore + filter |
|--------|---------------------|--------------------|---------------------|----------------------|
| ace    | 4.64 ± 0.96         | <b>7.59 ± 0.98</b> | 3.28 ± 0.70         | 7.04 ± 1.00          |
| ache   | 7.57 ± 0.80         | <b>8.71 ± 0.83</b> | 8.11 ± 0.82         | 8.39 ± 1.12          |
| cdk2   | 0.85 ± 0.33         | 5.02 ± 0.69        | <b>6.18 ± 0.75</b>  | 5.14 ± 0.69          |
| cox2   | <b>10.49 ± 0.63</b> | 7.32 ± 0.59        | 5.72 ± 0.54         | 1.66 ± 0.39          |
| egfr   | <b>9.34 ± 0.54</b>  | 8.38 ± 0.57        | 5.10 ± 0.40         | 9.25 ± 0.57          |
| fxa    | <b>5.14 ± 0.87</b>  | 3.46 ± 0.84        | 4.29 ± 1.09         | 4.18 ± 0.91          |
| hivrt  | 5.14 ± 0.99         | 6.63 ± 0.96        | 4.95 ± 0.82         | <b>5.88 ± 1.01</b>   |
| inha   | 6.85 ± 0.74         | 8.10 ± 0.82        | <b>10.21 ± 0.85</b> | 4.18 ± 0.75          |
| p38    | 0.53 ± 0.08         | 0.11 ± 0.02        | 2.61 ± 0.54         | <b>10.49 ± 1.49</b>  |
| pde5   | 4.75 ± 0.96         | 5.49 ± 0.89        | <b>9.92 ± 1.06</b>  | 6.90 ± 1.36          |
| pdgfrb | 3.56 ± 0.62         | 1.35 ± 0.43        | 0.74 ± 0.14         | <b>8.63 ± 1.15</b>   |
| src    | 2.40 ± 0.62         | 2.38 ± 0.69        | <b>9.67 ± 0.85</b>  | 0.19 ± 0.11          |
| vegfr2 | 3.57 ± 0.63         | 1.89 ± 0.59        | <b>7.69 ± 0.82</b>  | 6.27 ± 0.79          |

**Table S10.** awAUC of FieldScreen, FLAP (LBX), FLAP(RBLB), MedusaScore + filter

| target | FieldScreen        | FLAP (LBX)         | FLAP (RBLB)        | MedusaScore + filter |
|--------|--------------------|--------------------|--------------------|----------------------|
| ace    | 0.64 ± 0.04        | <b>0.69 ± 0.03</b> | 0.53 ± 0.03        | 0.63 ± 0.04          |
| ache   | 0.63 ± 0.03        | 0.62 ± 0.04        | <b>0.74 ± 0.03</b> | 0.73 ± 0.03          |
| cdk2   | 0.44 ± 0.02        | 0.68 ± 0.02        | 0.50 ± 0.03        | <b>0.71 ± 0.02</b>   |
| cox2   | <b>0.82 ± 0.02</b> | 0.69 ± 0.02        | 0.49 ± 0.02        | 0.39 ± 0.02          |
| egfr   | 0.82 ± 0.01        | 0.70 ± 0.02        | 0.55 ± 0.02        | <b>0.85 ± 0.01</b>   |
| fxa    | <b>0.73 ± 0.02</b> | 0.61 ± 0.03        | 0.62 ± 0.03        | 0.72 ± 0.02          |
| hivrt  | <b>0.64 ± 0.04</b> | 0.56 ± 0.04        | 0.61 ± 0.04        | <b>0.64 ± 0.04</b>   |
| inha   | <b>0.72 ± 0.02</b> | 0.66 ± 0.03        | 0.67 ± 0.03        | 0.57 ± 0.03          |
| p38    | 0.28 ± 0.02        | 0.31 ± 0.02        | 0.45 ± 0.03        | <b>0.81 ± 0.03</b>   |
| pde5   | 0.62 ± 0.03        | 0.55 ± 0.04        | 0.64 ± 0.05        | <b>0.75 ± 0.04</b>   |
| pdgfrb | 0.40 ± 0.03        | 0.44 ± 0.02        | 0.34 ± 0.03        | <b>0.69 ± 0.03</b>   |
| src    | 0.39 ± 0.03        | 0.44 ± 0.03        | <b>0.80 ± 0.02</b> | 0.66 ± 0.05          |
| vegfr2 | 0.53 ± 0.03        | 0.59 ± 0.03        | 0.61 ± 0.03        | <b>0.67 ± 0.03</b>   |
